# Supplementary material
Source: PubMed Central journal article supplement (PMC7003672)
Supplement: NIHMS1067546-supplement-Supplement.pdf [file NIHMS1067546-supplement-Supplement.pdf]

**Table S1. Agreement of high confidence predicted contacts from residue co-evolution with PpdD pilus model, related to Figure 3.** The accuracy (number of contacts with Prob > 0.7 consistent with the model/total number of contacts) is reported for increasing distance thresholds and for different rotameric states of the PpdD pilus model. A contact is considered as consistent with the model if the shortest distance between any non-hydrogen atoms of the two involved residues is smaller than the threshold. Optimized side-chain rotamers were built with SCWRL4.0 (Krivov et al., 2009). Alternatively, the at-most 10 best (most frequent) rotameric states from the Dunbrack library (Shapovalov and Dunbrack, 2011) were considered simultaneously to measure inter-residue distances in the PpdD pilus model.

| <b>Distance threshold (Å)</b> | <b>PpdD pilus model (PDB 6GV9)</b> | <b>PpdD pilus model + optimized side-chain rotamers</b> | <b>PpdD pilus model + 10 best side-chain rotamers</b> |
|-------------------------------|------------------------------------|---------------------------------------------------------|-------------------------------------------------------|
| 5                             | 46.8 %                             | 47.5 %                                                  | 60.3 %                                                |
| 8                             | 79.4 %                             | 79.4 %                                                  | 83.0 %                                                |
| 10                            | 88.7 %                             | 89.4 %                                                  | 90.1 %                                                |
| 12                            | 91.5 %                             | 92.9 %                                                  | 94.3 %                                                |

**Table S2. Sequence and structure similarity between EHEC PpdD and other T4a pilins, related to Figure 1.**

| <b>Pilin*</b>  | <b>PDB id</b> | <b>% identity (full-length)</b> | <b>% identity (from Pro 22)</b> | <b>RMSD (Å)#</b> |
|----------------|---------------|---------------------------------|---------------------------------|------------------|
| Ft PilE        | 3SOJ          | 25                              | 16                              | 2.7              |
| Pa K122-4 PilA | 1QVE          | 31                              | 23                              | 2.8              |
| Pa PAK PilA    | 1OQW          | 30                              | 22                              | 2.8              |
| Dn FimA        | 3SOK          | 28                              | 20                              | 3.0              |
| Pa 110594 PilA | 3JYZ          | 26                              | 18                              | 3.1              |
| Ab PilA        | 5IHJ          | 30                              | 20                              | 3.1              |
| Nm PilE        | 5JW8          | 32                              | 26                              | 3.2              |
| Ng PilE        | 1AY2          | 32                              | 26                              | 3.2              |

\* Ft : *Francisella tularensis* ; PaK122-4 : *Pseudomonas aeruginosa* strain K122-4 ; PAK : *Pseudomonas aeruginosa* strain PAK ; Dn : *Dichelobacter nodosus* ; Pa110594 : *Pseudomonas aeruginosa* strain Pa110594 ; Ab : *Acinetobacter baumannii* ; Nm : *Neisseria meningitidis* ; Ng : *Neisseria gonorrhoeae*.

# Computed with TM-align (Zhang and Skolnick, 2005).

**Table S3. Plasmids used in this study, related to STAR Methods.**

| <b>Plasmid name</b> | <b>Ori/resistance<sup>1</sup></b> | <b>Relevant markers</b>                   | <b>Source/reference</b>               |
|---------------------|-----------------------------------|-------------------------------------------|---------------------------------------|
| pCHAP8184           | ColE1/Ap <sup>R</sup>             | <i>pulS,pulAB pulCDEFHIJKLMNO</i>         | (Campos <i>et al.</i> , 2010)         |
| pSU18               | p15A/Cm <sup>R</sup>              | <i>placZ-lacZα</i>                        | (Bartolome <i>et al.</i> , 1991)      |
| pUC18               | ColE1/Ap <sup>R</sup>             | <i>placZ-lacZα</i>                        | (Yanisch-Perron <i>et al.</i> , 1985) |
| pCHAP8565           | p15A/Cm <sup>R</sup>              | <i>ppdD EHEC</i>                          | (Luna Rico <i>et al.</i> , 2019)      |
| pCHAP6263           | p15A/Cm <sup>R</sup>              | <i>ppdD<sup>E5A</sup></i>                 | This study                            |
| pCHAP6250           | p15A/Cm <sup>R</sup>              | <i>ppdD<sup>D35R</sup></i>                | This study                            |
| pCHAP6254           | p15A/Cm <sup>R</sup>              | <i>ppdD<sup>R29E</sup></i>                | This study                            |
| pCHAP6256           | p15A/Cm <sup>R</sup>              | <i>ppdD<sup>E131K</sup></i>               | This study                            |
| pCHAP6257           | p15A/Cm <sup>R</sup>              | <i>ppdD<sup>E92K</sup></i>                | This study                            |
| pCHAP6258           | p15A/Cm <sup>R</sup>              | <i>ppdD<sup>K83E</sup></i>                | This study                            |
| pCHAP6260           | p15A/Cm <sup>R</sup>              | <i>ppdD<sup>R74D</sup></i>                | This study                            |
| pCHAP6261           | p15A/Cm <sup>R</sup>              | <i>ppdD<sup>K30E</sup></i>                | This study                            |
| pCHAP6264           | p15A/Cm <sup>R</sup>              | <i>ppdD<sup>R44D</sup></i>                | This study                            |
| pCHAP6265           | p15A/Cm <sup>R</sup>              | <i>ppdD<sup>D106R</sup></i>               | This study                            |
| pCHAP6266           | p15A/Cm <sup>R</sup>              | <i>ppdD<sup>R116D</sup></i>               | This study                            |
| pCHAP6267           | p15A/Cm <sup>R</sup>              | <i>ppdD<sup>D132R</sup></i>               | This study                            |
| pCHAP6268           | p15A/Cm <sup>R</sup>              | <i>ppdD<sup>E48K</sup></i>                | This study                            |
| pCHAP6269           | p15A/Cm <sup>R</sup>              | <i>ppdD<sup>E53K</sup></i>                | This study                            |
| pCHAP6317           | p15A/Cm <sup>R</sup>              | <i>ppdD<sup>D58K</sup></i>                | This study                            |
| pCHAP6271           | p15A/Cm <sup>R</sup>              | <i>ppdD<sup>D61R</sup></i>                | This study                            |
| pCHAP6272           | p15A/Cm <sup>R</sup>              | <i>ppdD<sup>D123R</sup></i>               | This study                            |
| pCHAP6316           | p15A/Cm <sup>R</sup>              | <i>ppdD<sup>D35K</sup></i>                | This study                            |
| pCHAP6320           | p15A/Cm <sup>R</sup>              | <i>ppdD<sup>K30D</sup></i>                | This study                            |
| pCHAP6333           | p15A/Cm <sup>R</sup>              | <i>ppdD<sup>R74E</sup></i>                | This study                            |
| pCHAP6319           | p15A/Cm <sup>R</sup>              | <i>ppdD<sup>D106K</sup></i>               | This study                            |
| pCHAP6321           | p15A/Cm <sup>R</sup>              | <i>ppdD<sup>R29D</sup></i>                | This study                            |
| pCHAP6253           | p15A/Cm <sup>R</sup>              | <i>ppdD<sup>D137K</sup></i>               | This study                            |
| pCHAP6262           | p15A/Cm <sup>R</sup>              | <i>ppdD<sup>D138R</sup></i>               | This study                            |
| pCHAP6280           | p15A/Cm <sup>R</sup>              | <i>ppdD<sup>D137K D138R</sup></i>         | This study                            |
| pCHAP6259           | p15A/Cm <sup>R</sup>              | <i>ppdD<sup>R135E</sup></i>               | This study                            |
| pCHAP6327           | p15A/Cm <sup>R</sup>              | <i>ppdD<sup>D35K R74D</sup></i>           | This study                            |
| pCHAP6337           | p15A/Cm <sup>R</sup>              | <i>ppdD<sup>D35K R74E</sup></i>           | This study                            |
| pCHAP8968           | p15A/Cm <sup>R</sup>              | <i>ppdD<sup>D35R R74D</sup></i>           | This study                            |
| pCHAP8969           | p15A/Cm <sup>R</sup>              | <i>ppdD<sup>D137R D138K R74D</sup></i>    | This study                            |
| pCHAP8970           | p15A/Cm <sup>R</sup>              | <i>ppdD<sup>D137R D138K R74E</sup></i>    | This study                            |
| pCHAP6314           | p15A/Cm <sup>R</sup>              | <i>ppdD<sup>E92R</sup></i>                | This study                            |
| pCHAP6257           | p15A/Cm <sup>R</sup>              | <i>ppdD<sup>E92K</sup></i>                | This study                            |
| pCHAP6259           | p15A/Cm <sup>R</sup>              | <i>ppdD<sup>R135E</sup></i>               | This study                            |
| pCHAP6322           | p15A/Cm <sup>R</sup>              | <i>ppdD<sup>R135D</sup></i>               | This study                            |
| pCHAP6277           | p15A/Cm <sup>R</sup>              | <i>ppdD<sup>E92K R135E</sup></i>          | This study                            |
| pCHAP6285           | p15A/Cm <sup>R</sup>              | <i>ppdD<sup>E92K R135D</sup></i>          | This study                            |
| pCHAP8956           | p15A/Cm <sup>R</sup>              | <i>ppdD<sup>D35K R135E</sup></i>          | This study                            |
| pUT18c              | ColE1/Ap <sup>R</sup>             | <i>placUV5-cyaA</i> T18 fragment in pUC18 | (Karimova <i>et al.</i> , 1998)       |
| pKT25               | p15A/Km <sup>R</sup>              | <i>placUV5-cyaA</i> T25 fragment in pSU38 | (Karimova <i>et al.</i> , 1998)       |
| pCHAP8501           | ColE1/Ap <sup>R</sup>             | <i>T18-ppdD</i>                           | (Luna Rico <i>et al.</i> , 2019)      |
| pCHAP8504           | p15A/Km <sup>R</sup>              | <i>T25-ppdD</i>                           | (Luna Rico <i>et al.</i> , 2019)      |
| pCHAP8973           | ColE1/Ap <sup>R</sup>             | <i>T18-ppdD<sup>E5A</sup></i>             | This study                            |
| pCHAP8768           | ColE1/Ap <sup>R</sup>             | <i>T18-ppdD<sup>R29E</sup></i>            | This study                            |
| pCHAP8770           | ColE1/Ap <sup>R</sup>             | <i>T18-ppdD<sup>K30E</sup></i>            | This study                            |
| pCHAP8772           | ColE1/Ap <sup>R</sup>             | <i>T18-ppdD<sup>D35K</sup></i>            | This study                            |
| pCHAP8774           | ColE1/Ap <sup>R</sup>             | <i>T18-ppdD<sup>R44D</sup></i>            | This study                            |
| pCHAP8776           | ColE1/Ap <sup>R</sup>             | <i>T18-ppdD<sup>E48K</sup></i>            | This study                            |
| pCHAP8916           | ColE1/Ap <sup>R</sup>             | <i>T18-ppdD<sup>D58K</sup></i>            | This study                            |
| pCHAP8780           | ColE1/Ap <sup>R</sup>             | <i>T18-ppdD<sup>D61K</sup></i>            | This study                            |

|           |                       |                                                                                                    |                           |
|-----------|-----------------------|----------------------------------------------------------------------------------------------------|---------------------------|
| pCHAP8782 | ColE1/Ap <sup>R</sup> | <i>T18-ppdD</i> <sup>R74D</sup>                                                                    | This study                |
| pCHAP8784 | ColE1/Ap <sup>R</sup> | <i>T18-ppdD</i> <sup>R116D</sup>                                                                   | This study                |
| pCHAP8786 | ColE1/Ap <sup>R</sup> | <i>T18-ppdD</i> <sup>R135E</sup>                                                                   | This study                |
| pCHAP8920 | ColE1/Ap <sup>R</sup> | <i>T18-ppdD</i> <sup>K83E</sup>                                                                    | This study                |
| pCHAP8922 | ColE1/Ap <sup>R</sup> | <i>T18-ppdD</i> <sup>E92K</sup>                                                                    | This study                |
| pCHAP8924 | ColE1/Ap <sup>R</sup> | <i>T18-ppdD</i> <sup>D106R</sup>                                                                   | This study                |
| pCHAP8926 | ColE1/Ap <sup>R</sup> | <i>T18-ppdD</i> <sup>D123R</sup>                                                                   | This study                |
| pCHAP8928 | ColE1/Ap <sup>R</sup> | <i>T18-ppdD</i> <sup>E131R</sup>                                                                   | This study                |
| pCHAP8930 | ColE1/Ap <sup>R</sup> | <i>T18-ppdD</i> <sup>D132R</sup>                                                                   | This study                |
| pCHAP8936 | ColE1/Ap <sup>R</sup> | <i>T18-ppdD</i> <sup>D138R</sup>                                                                   | This study                |
| pCHAP8155 | p15A/Km <sup>R</sup>  | <i>T25-pulM</i>                                                                                    | (Nivaskumar et al., 2016) |
| pCHAP8910 | p15A/Km <sup>R</sup>  | <i>T25-hofN</i>                                                                                    | (Luna Rico et al., 2019)  |
| pMS41     | ColE1/Ap <sup>R</sup> | EHEC T4PS ( <i>ΔppdD</i> , <i>hofBC</i> , <i>hofMNOPQ</i> , <i>ppdAB-ygdB-ppdC</i> , <i>gspO</i> ) | (Luna Rico et al., 2019)  |

<sup>1</sup>ori, replication origin group, Ap<sup>R</sup>, ampicillin-resistance; Cm<sup>R</sup>, chloramphenicol-resistance, Km<sup>R</sup>, kanamycin-resistance).

**Table S4. Oligonucleotides used in this study, related to STAR Methods.**

| Oligonucleotide name | Sequence (5'-3')                         |
|----------------------|------------------------------------------|
| PpdD-SD-EcoRI        | CTATTCTGAATTCAAAGTAGCGCCAACCAAATC        |
| PpdD-Hind-3          | cacAAGCTTGCATGCCTGCAGGTCGACTCTAG         |
| HofC EcoRI 5         | CACGAATTCGAAGAGTTAATCCGCGTATTG           |
| HofC Hind 3          | GACTGCAAGCTTCGTTATCCCATCCCCTCATCG        |
| HofM Pst 5           | CGCCTGCAGGGTAGTATAAAGGCAAGC              |
| HofQ Sph 3           | CACGCATGCCACGTTTCAGCGTAAAAAC             |
| PpdD 5 Kpn           | GCAGGTACCTATGACACTTATCGAACTGATGGTG       |
| PpdD 3 Eco           | CACGAATTCATTTTCAGTGAGCTGTGGAAT           |
| PpdDE5A 5 Kpn        | GCAGGTACCTATGACACTTATCGcACTGATGGTG       |
| PpdD D35R 5          | CAAAGCCGCACTCACCcgCATGCTACAAAC           |
| PpdD D35R 3          | GTTTGTAGCATGcgGGTGAGTGCGGCTTTG           |
| PpdD E5A 5           | GTTTTACACTTATCGcACTGATGGTGG              |
| PpdD E5A 3           | CCACCATCAGTgCGATAAGTGTA AAAAC            |
| PpdD R29E 5          | CAAAACTACCTGgaaAAAGCCGCACTC              |
| PpdD R29E 3          | GAGTGCGGCTTTtCAGGTAGTTTTTG               |
| PpdD R29D 5          | TATCAAAACTACCTGgaCAAAGCCGCACTCACC        |
| PpdD R29D 3          | GGTGAGTGCGGCTTTGtcCAGGTAGTTTTGATA        |
| PpdD K30E 5          | ACTACCTGCGCgAAGCCGCACTC                  |
| PpdD K30E 3          | GAGTGCGGCTTcGCGCAGGTAGT                  |
| PpdD K30D 5          | CAAAACTACCTGCGCgAtGCCGCACTCACC GAC       |
| PpdD K30D 3          | GTCGGTGAGTGCGGCaTcGCGCAGGTAGTTTTG        |
| PpdD R44D 5          | CCTTTGTGCCTTACgaTACCGCCGTAGAG            |
| PpdD R44D 3          | CTCTACGGCGGTATcGTAAGGCACAAAGG            |
| PpdD K30D 5          | CAAAACTACCTGCGCgAtGCCGCACTCACC GAC       |
| PpdD K30D 3          | GTCGGTGAGTGCGGCaTcGCGCAGGTAGTTTTG        |
| PpdD D35K 5          | AAAGCCGCACTCACCaAaATGCTACAAACCTTTG       |
| PpdD D35K 3          | CAAAGGTTTGTAGCATtTtGGTGAGTGCGGCTTT       |
| PpdD R74D 5          | CCTACCACCACCgaCTATGTTTCAGCC              |
| PpdD R74D 3          | GGCTGAAACATAGtcGGTGGTGGTAGG              |
| PpdD R74E 5          | CCCTCGCTACCACCACCgaaTATGTTTCAGCCATGAGTG  |
| PpdD R74E 3          | CACTCATGGCTGAAACATAAtcGGTGGTGGTAGGCGAGGG |
| PpdD D106R 5         | CATGACGCCAGGTTGgGTAACGCAAACGGCGTCAC      |
| PpdD D106R 3         | GTGACGCCGTTTTCGTTAegCCAACCTGGCGTCATG     |
| PpdD D106K 5         | ATGACGCCAGGTTGGaAaAACGCAAACGGCGTC        |
| PpdD D106K 3         | GACGCCGTTTTCGTTtTtCCAACCTGGCGTCAT        |
| PpdD D137K 5         | GTCTTCCGCTTTaAaGACGCCAACTAAG             |
| PpdD D137K 3         | CTTAGTTGGCGTCTtTAAAGCGGAAGAC             |
| PpdD D138R 5         | GTCTTCCGCTTTGATcgCGCCAACTAAGG            |
| PpdD D138R 3         | CCTTAGTTGGCGegATCAAAGCGGAAGAC            |
| PpdD D137K D138R 5   | AAGATGCTTCCGCTTTaAacgcCCAACCTAAGGAGC     |
| PpdD D137K D138R 3   | GCTCCTTAGTTGGCgcgTtTAAAGCGGAAGACATCTT    |
| PpdD E131K 5         | CAGCAAGCCTGCaAAGATGTCTTCC                |
| PpdD E131K 3         | GGAAGACATCTTtGCAGGCTTGCTG                |
| PpdD E92K 5          | CTGACCGGGCAAAgAGTCTCAATGG                |
| PpdD E92K 3          | CCATTGAGACTcTtTTGCCCGGTCAG               |
| PpdD K83E 5          | CATGAGTGTGGCAgAGGGCGTGGTG                |
| PpdD K83E 3          | CACCACGCCCTcTGCCCACTCATG                 |

|                  |                                           |
|------------------|-------------------------------------------|
| PpdD D132R 5     | GCAAGCCTGCGAACGTGTCTTCCGCTTTGATGACG       |
| PpdD D132R 3     | CGTCATCAAAGCGGAAGACACGTTTCGAGGCTTGC       |
| PpdD D123R 5     | GCAATATTCAAAGTCGCAGCGCATTGCAGC            |
| PpdD D123R 3     | GCTGCAATGCGCTGCGACTTTGAATATTGC            |
| PpdD D61R 5      | GGATTAGATACCTGCCGCGGTGGCAGCAATGG          |
| PpdD D61R 3      | CCATTGCTGCCACCGCGGCAGGTATCTAATCC          |
| PpdD R135E 5     | GAAGATGTCTTCgaATTcGATGACGCCAAC            |
| PpdD R135E 3     | GTTGGCGTCATCgAATtcGAAGACATCTTC            |
| PpdD E48K 5      | CCTTACCGTACCGCCGTAAAGTTGTGCGCGCTGG        |
| PpdD E48K 3      | CCAGCGCGCACAACTTTACGGCGGTACGGTAAGG        |
| PpdD E53K 5      | GGTATCTAATCCACCATGTTTCAGCGCGCACAACTCTACG  |
| PpdD E53K 3      | GCCACCGTCGCAGGTtTtTAATCCACCATGTTC         |
| PpdD D58K 5      | GAACATGGTGGATTAaAaACCTGCGACGGTGGC         |
| PpdD D58K 3      | CCACCGTCGCAGGTACGTAATCCACCATGTTCC         |
| PpdD R116D 5     | CGTCACCGGCTGGGCGgaCAACTGCAATATTCAAAG      |
| PpdD R116D 3     | CTTTGAATATTGCAGTTGtcCGCCAGCCGGTGACG       |
| PpdD R44E E48K 5 | CCTTACgaaACCGCCGTAAAGTTGTGCGCGCTGG        |
| PpdD R44E E48K 3 | CCAGCGCGCACAACTtTACGGCGGTtcGTAAGG         |
| PpdD R44D E48R 5 | GCCTTACgaTACCGCCGTAcgtTTGTGCGCGCTGGAACATG |
| PpdD R44D E48R 3 | CATGTTCCAGCGCGCACAAacgTACGGCGGTAtcGTAAGGC |

**Table S5. Refinement statistics of the PpdD pilus structure, related to STAR Methods.**

| <b>Deviation from ideal geometry</b> |        |
|--------------------------------------|--------|
| RMS <sup>a</sup> for bond lengths    | 0.02 Å |
| RMS for bond angles                  | 2.40°  |
| C $\beta$ deviations                 | 0 %    |
| <b>Molprobit statistics</b>          |        |
| Ramachandran favoured                | 92.0 % |
| Ramachandran allowed                 | 6.5 %  |
| Ramachandran outliers                | 1.4 %  |
| Rotamer outliers                     | 0 %    |
| Clashscore                           | 28.7   |
| Overall score                        | 2.43   |

<sup>a</sup>RMS, root mean square

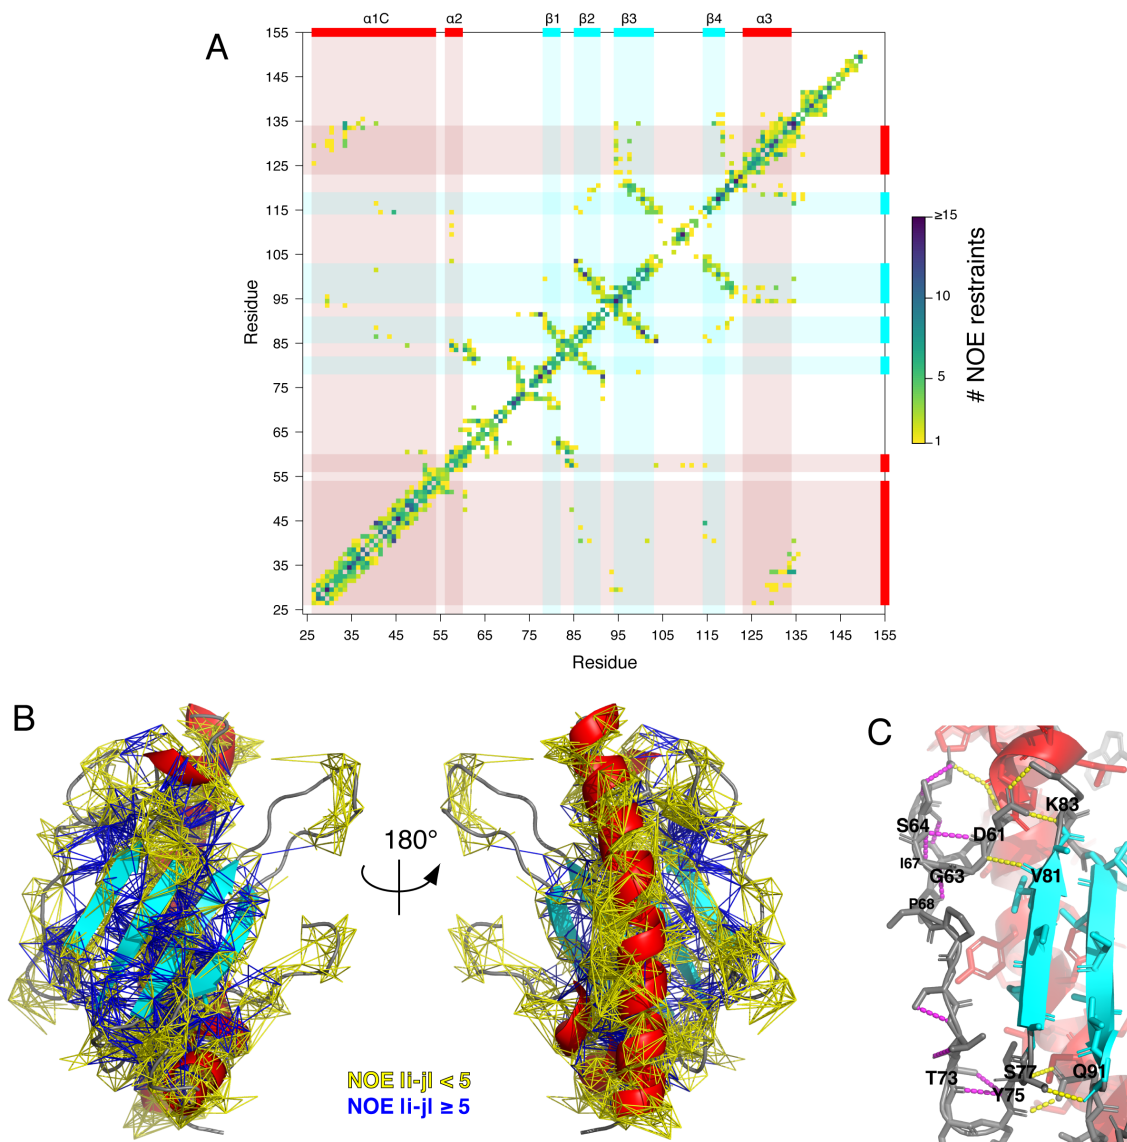

**Figure S1. NOE restraints of the PpdDp NMR structure, related to Table 1.** (A) Map of inter-residue NOE restraints used to calculate the PpdDp structure. The color scale corresponds to the number of unique NOE restraints for a pair of residues. Secondary structures are shown in red (helix) and cyan (strands). (B) NOE restraints shown on the lowest energy conformer of the PpdDp NMR structure. Long range NOE restraints are shown with blue lines and other NOE restraints with yellow lines. (C) Hydrogen-bonds detected in the PpdDp structure stabilizing the  $\alpha/\beta$  loop.



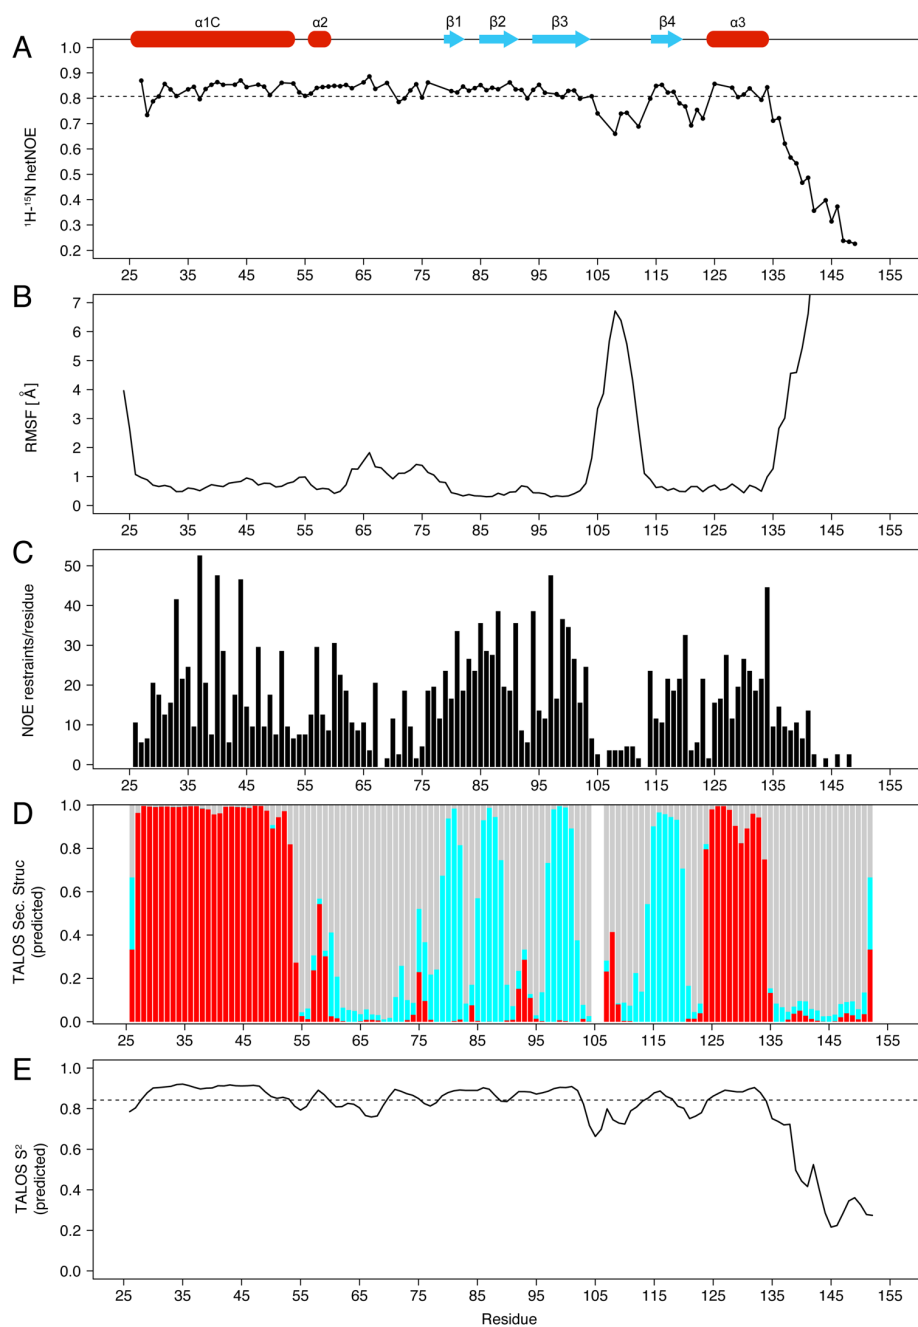

**Figure S2. Dynamics and flexibility of PpdDp in solution, related to Figure 1.** (A)  $^1\text{H}$ - $^{15}\text{N}$  heteronuclear NOE of PpdDp in solution. Secondary structure elements are shown on top (helix in red, strand in blue). (B) Ensemble Root Mean Square Fluctuation (RMSF) of the NMR PpdDp bundle. (C) Number of NOE ( $|i-j| > 1$ ) restraints per residue as assigned by ARIA. (D) Secondary structure (probabilities) predicted from chemical shifts using TALOS+ (red: helix, cyan: strand, grey: loop). (E) TALOS+ predicted order parameter  $S^2$ .

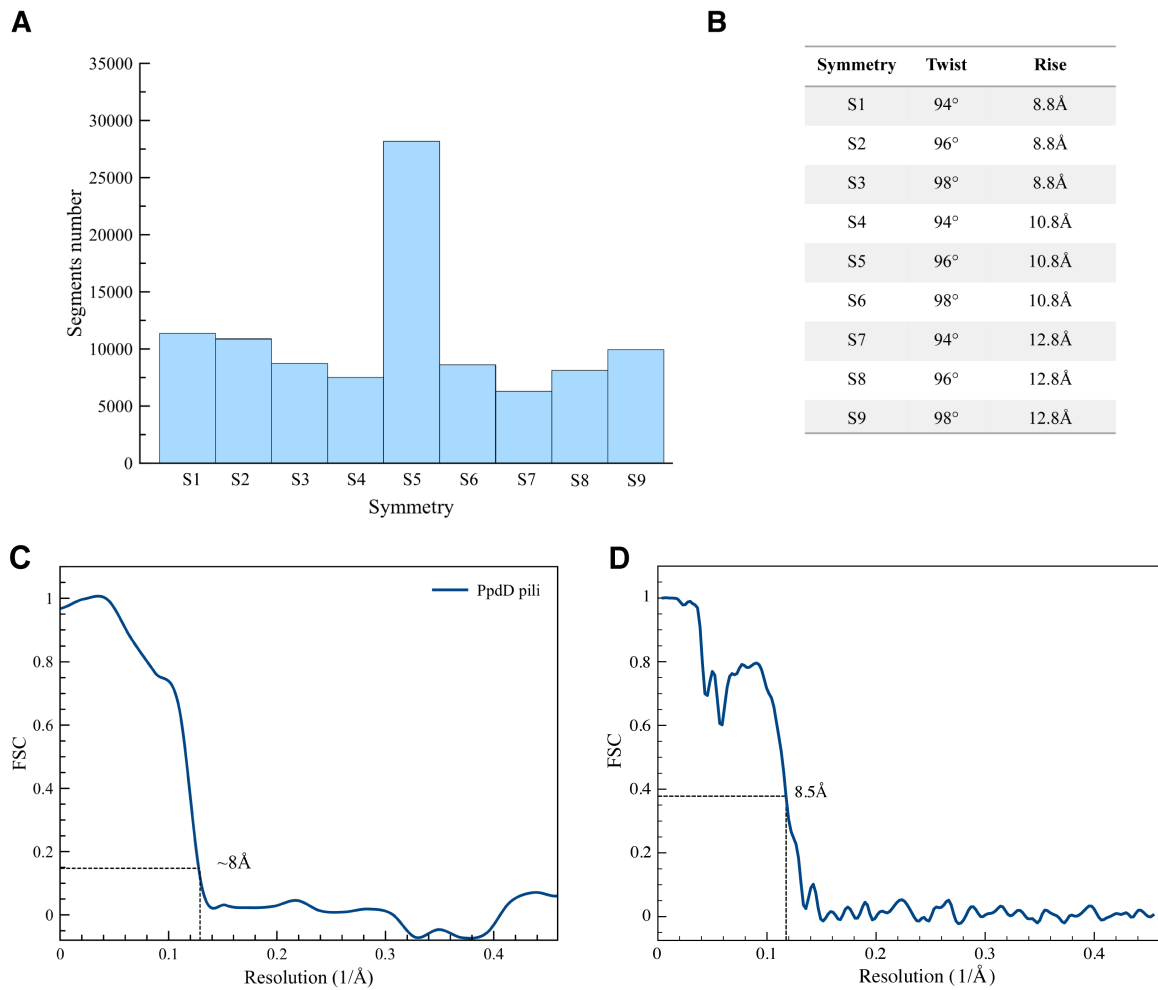

**Figure S3. Large variability in terms of the helical symmetry of PpdD pili, related to Figure 2.** (A) Histogram showing the symmetry distribution of PpdD pili segments. Nine reconstructions were generated with symmetry parameters shown in (B). These volumes were used for classifying the PpdD pili segments into different groups using a multi-reference alignment. (C, D) Fourier Shell Correlation (FSC) curves for the PpdD pili reconstruction. (C) The FSC of two half-maps shows a resolution of 8 Å at FSC=0.143. (D) The FSC curve for the refined PpdD pili model and the PpdD density map shows a resolution of 8.5 Å at FSC=0.38 ( $=\sqrt{0.143}$ ).

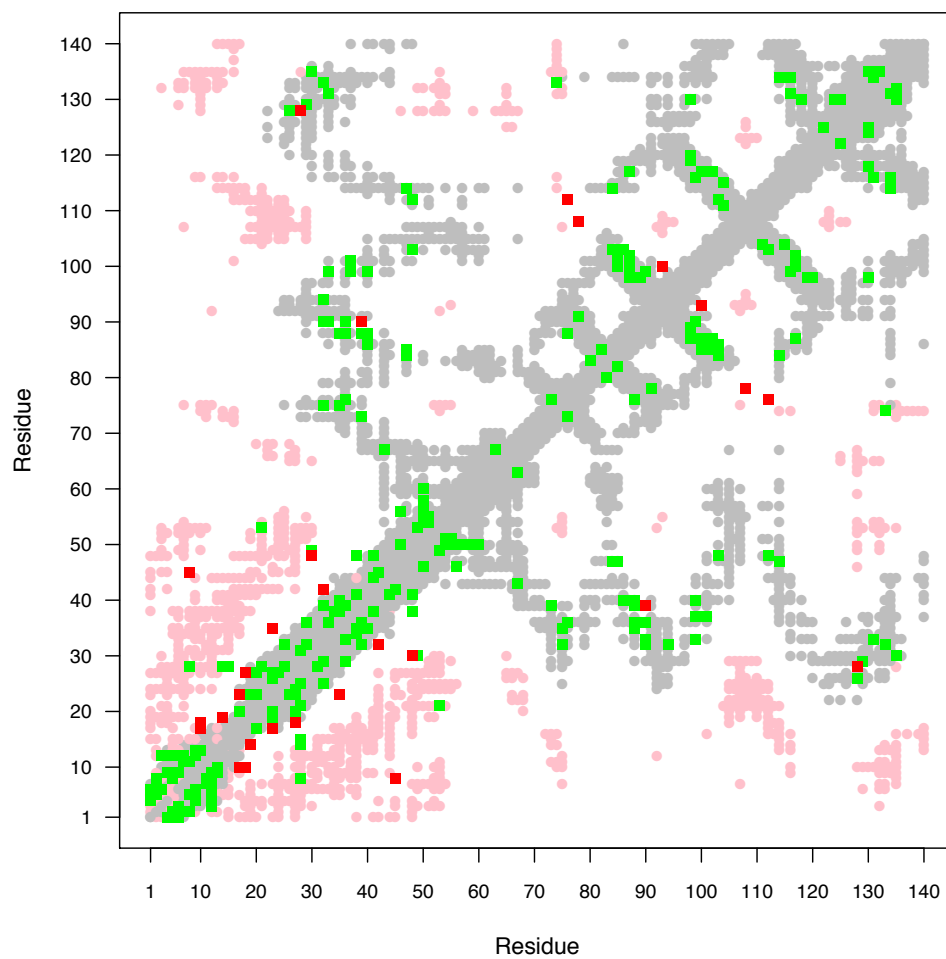

**Figure S4. EHEC PpD pilus contact map and evolutionary contact predictions, related to Figure 3.** Inter-residue contacts in PpD pilus ( $d_{ij} < 8 \text{ \AA}$ ) are shown in grey (intra-protomer) and pink (inter-protomer). High confidence evolutionary contact predictions from Gremlin (Kamisetty et al., 2013) are shown in green (consistent with PpD pilus model with  $d_{ij} < 10 \text{ \AA}$ ) and red (inconsistent).

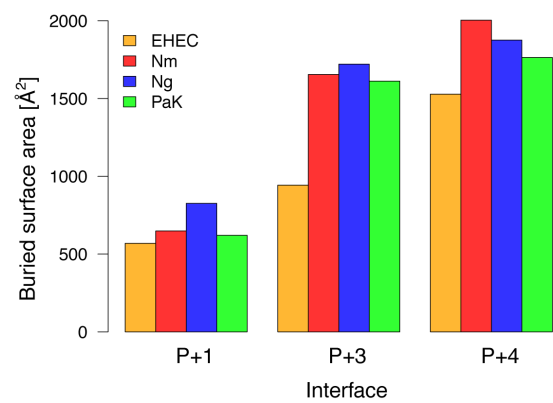

**Figure S5. Buried surface areas of inter-subunit interfaces in T4Pa structures, related to Figure 6.** Surface area was determined using atomic solvent accessible areas of isolated and complexed pilin subunits computed with the NACCESS program (Hubbard and Thornton, 1993).

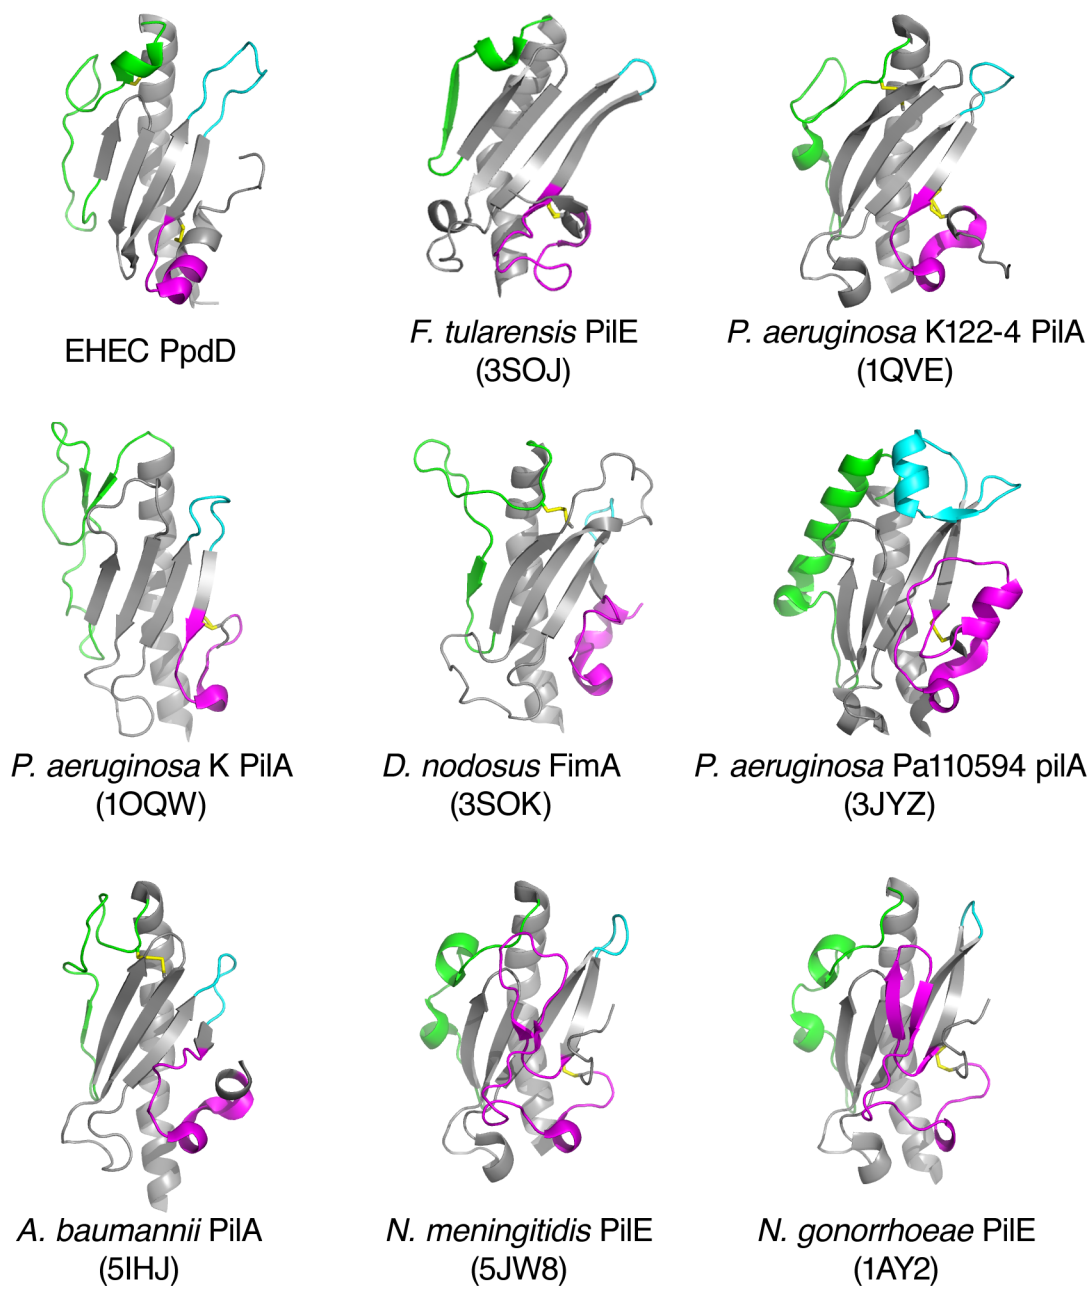

**Figure S6. Structural comparison of major T4a pilins (periplasmic domains), related to Figure 1.  $\alpha/\beta$  loop is shown in green,  $\beta_3/\beta_4$  loop in cyan and D-region in magenta.**

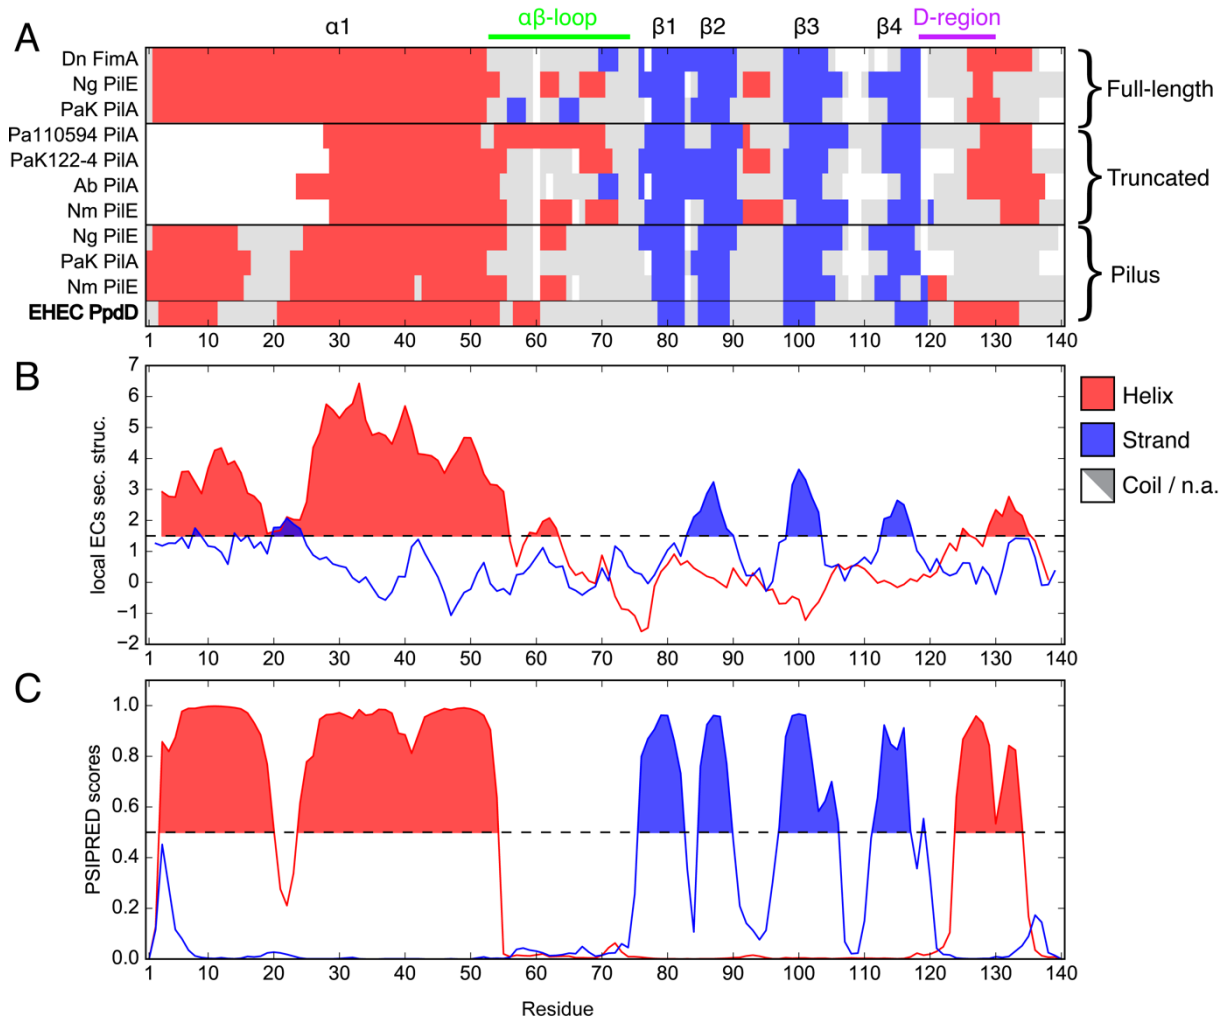

**Figure S7. Secondary structure elements in T4a pilins, related to Figure 7.** (A) Position of secondary structures elements of T4a pilin structures aligned on EHEC PpdD sequence and grouped according to the constructs and techniques used to solve the structure (Structures of full-length pilins solved by X-ray, truncated pilins missing the transmembrane segment and pilus structures solved by cryoEM). (B) Secondary structure score predicted from local evolutionary contacts within the T4a pilin family (Toth-Petroczy et al., 2016). (C) Secondary structure confidence score predicted with PSIPRED (Jones, 1999) on the EHEC PpdD pilin sequence.

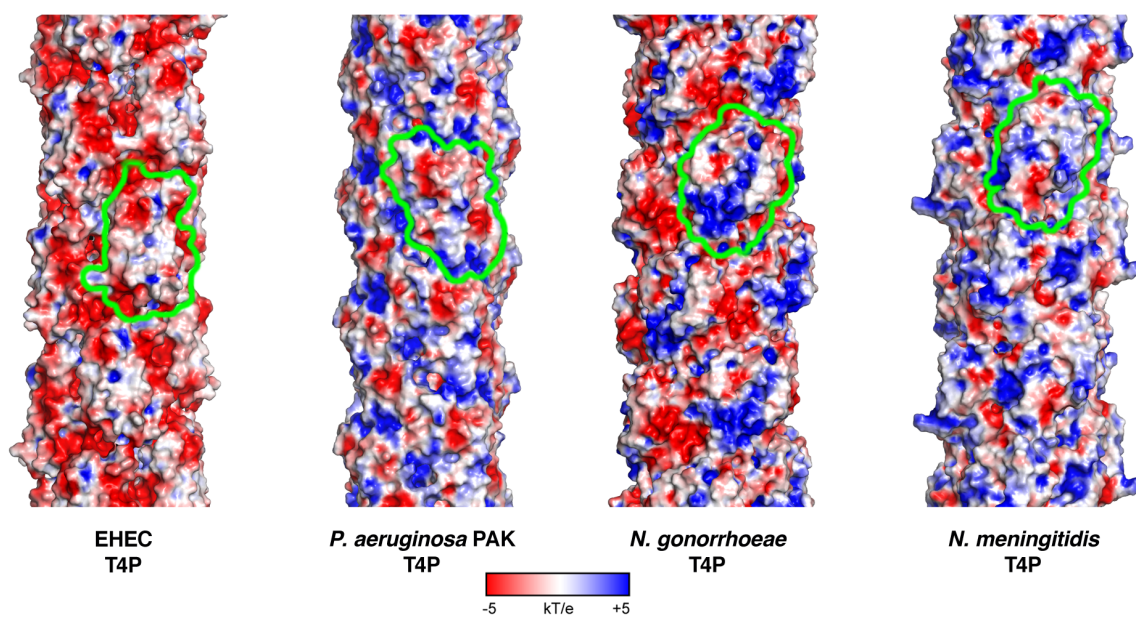

**Figure S8. Surface electrostatics potential of T4P pilus structure, related to Figure 7.** Electrostatics potential calculations were performed using APBS (Baker et al., 2001). The green lines delineate the surface of a single pilin subunit.
